# Supplementary material for: The efficacy and safety of cupping as complementary and alternative therapy for metabolic syndrome: A systematic review and meta-analysis
Source: PubMed Central journal article supplement — Medicine (Baltimore). 2023 Mar 31;102(13):e33341. doi: 10.1097/MD.0000000000033341 (PMC10063281; doi:10.1097/md.0000000000033341), 2023-03-31

# Supplement 4. Sensitivity Analyses

## 1. Sensitivity analyses for each of the anthropometric parameters by omitting any of the included studies

### (a) Waist Circumference (cm)

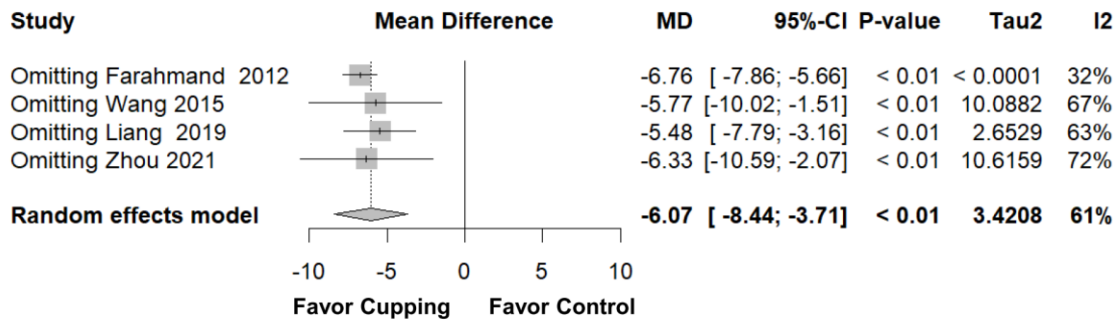

### (b) Weight (kg)

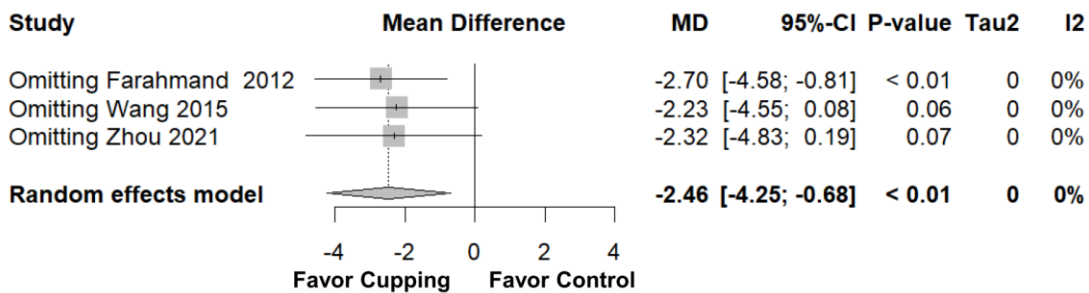

### (c) BMI

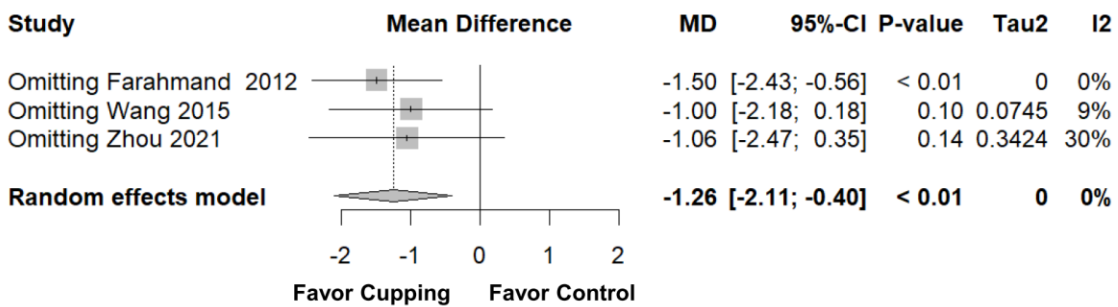

### (d) Total Fat (%)

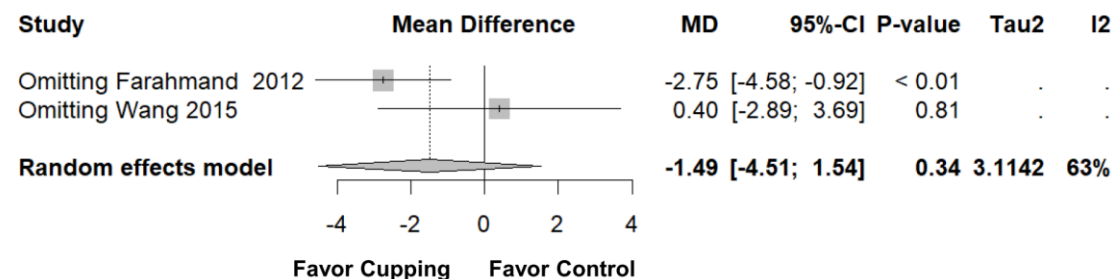

## 2. Sensitivity analyses for each of the blood pressure values by omitting any of the included studies

### (a) Systolic blood pressure (mmHg)

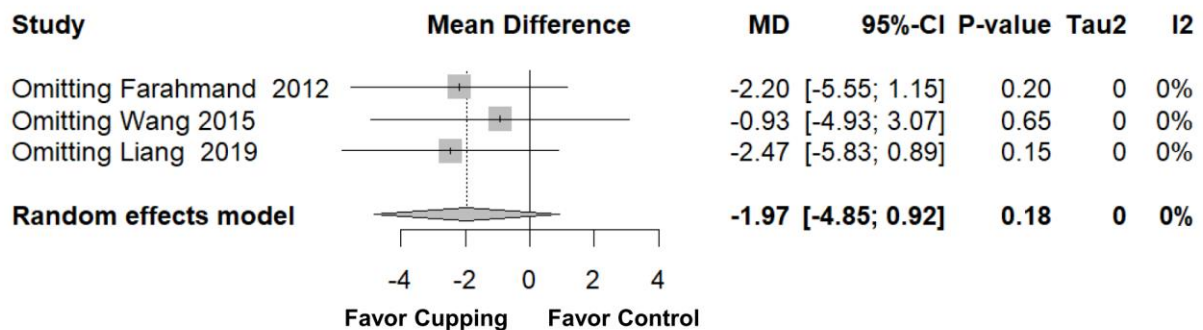

### (b) Diastolic blood pressure (mmHg)

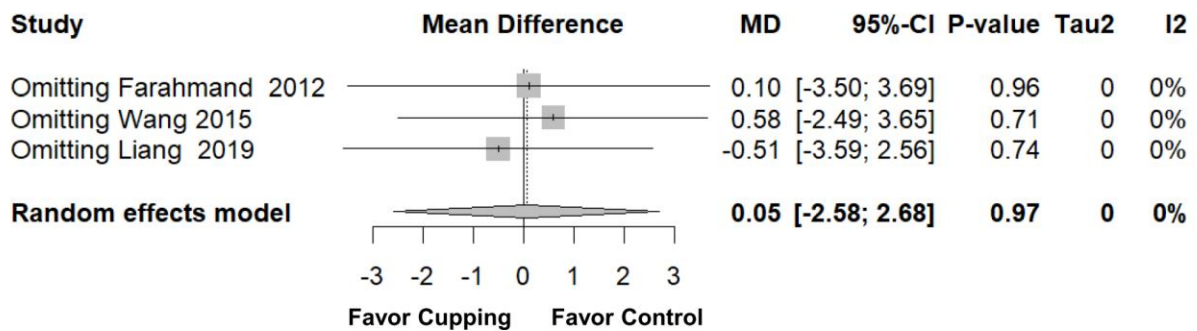

### 3. Sensitivity analyses for each of the lipid profile values by omitting any of the included studies

#### (a) Total Cholesterol (mg/dL)

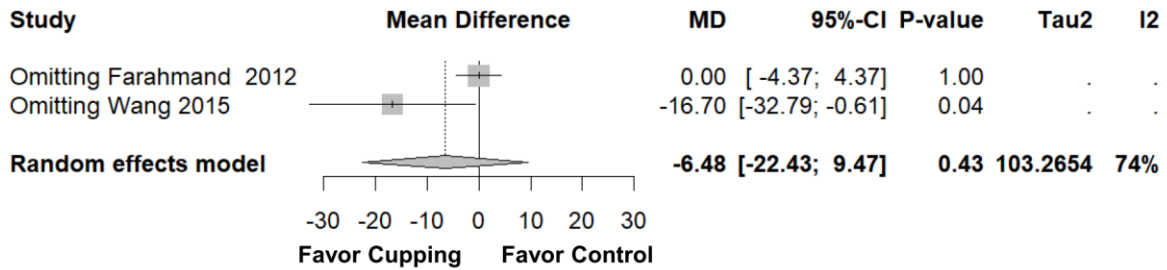

#### (b) Triglyceride (mg/dL)

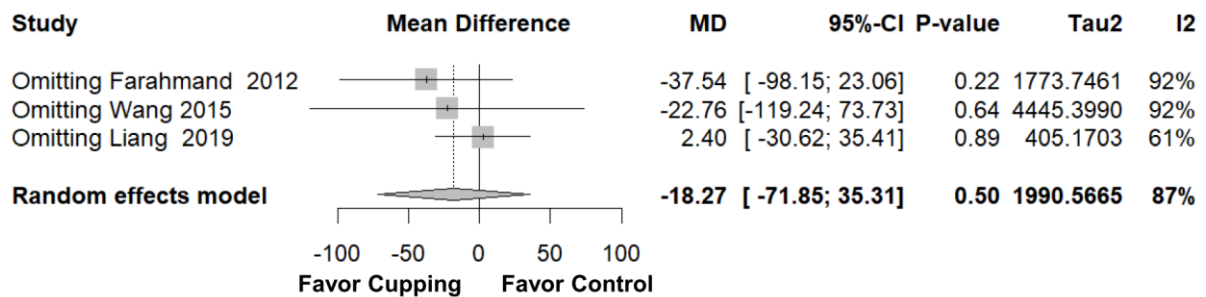

#### (c) HDL-C (mg/dL)

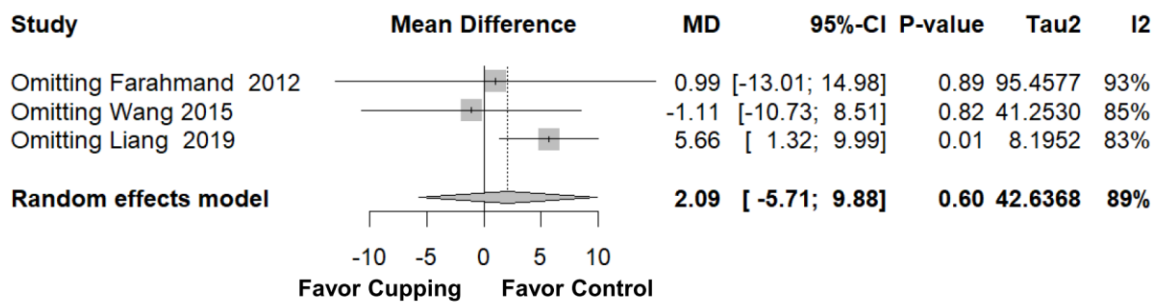

#### (d) LDL-C (mg/dL)

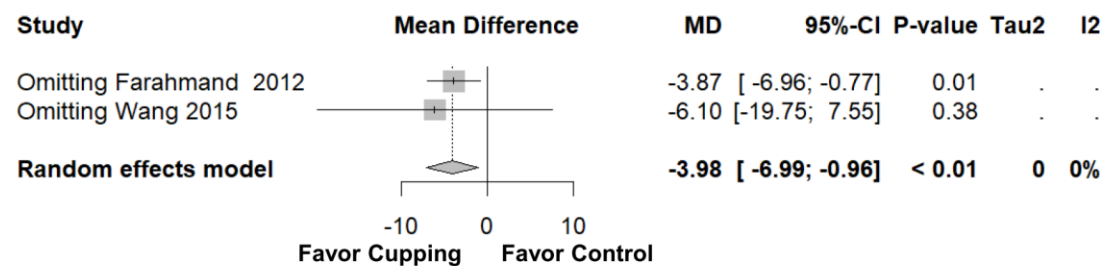

#### 4. Sensitivity analyses for each of the biochemical markers by omitting any of the included studies

##### (a) Fasting Blood Glucose(mg/dL)

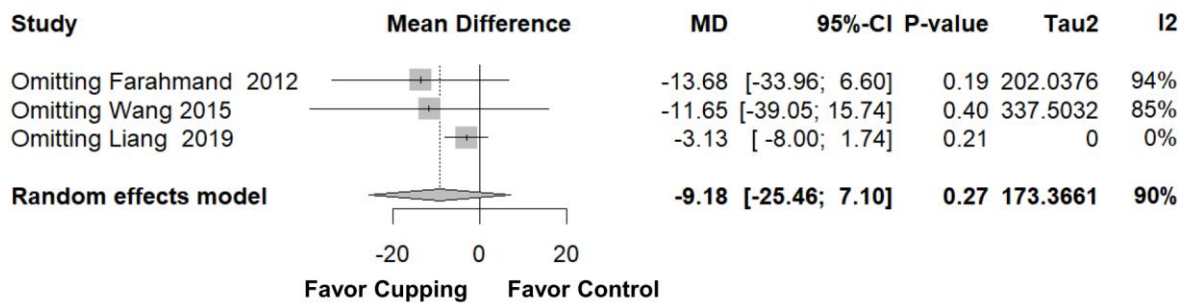

##### (b) hs-CRP(mg/L)

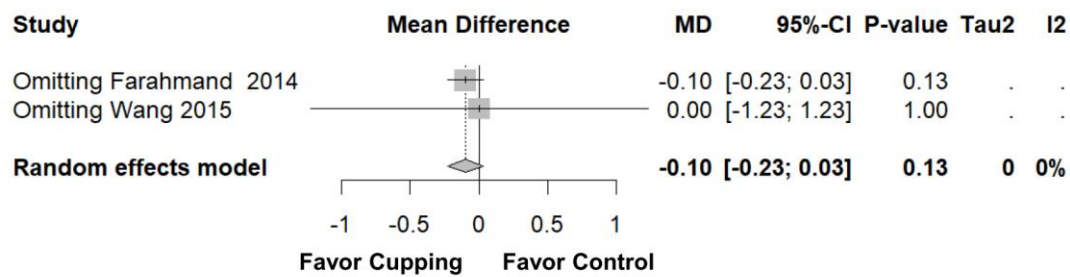

Supplement: medi-102-e33341-s004.pdf [file medi-102-e33341-s004.pdf]
