# Supplementary material for: The efficacy and safety of cupping as complementary and alternative therapy for metabolic syndrome: A systematic review and meta-analysis
Source: PubMed Central journal article supplement — Medicine (Baltimore). 2023 Mar 31;102(13):e33341. doi: 10.1097/MD.0000000000033341 (PMC10063281; doi:10.1097/md.0000000000033341), 2023-03-31
Supplement: medi-102-e33341-s001.pdf [file medi-102-e33341-s001.pdf]

## Supplement 1. Search Strategy for Each Database

| Database | Search Strategy                                                                                                                                                                                                                                                                                                                                                                                                                                                                                                                                                                                                                                                                                                                                                                                                                                                                                                                                                                                                                                                                                                                                                                                                                                                                                                                                                                                                                                                                                                                                                                                                                                                                                                                                                                                                                                                                                      |
|----------|------------------------------------------------------------------------------------------------------------------------------------------------------------------------------------------------------------------------------------------------------------------------------------------------------------------------------------------------------------------------------------------------------------------------------------------------------------------------------------------------------------------------------------------------------------------------------------------------------------------------------------------------------------------------------------------------------------------------------------------------------------------------------------------------------------------------------------------------------------------------------------------------------------------------------------------------------------------------------------------------------------------------------------------------------------------------------------------------------------------------------------------------------------------------------------------------------------------------------------------------------------------------------------------------------------------------------------------------------------------------------------------------------------------------------------------------------------------------------------------------------------------------------------------------------------------------------------------------------------------------------------------------------------------------------------------------------------------------------------------------------------------------------------------------------------------------------------------------------------------------------------------------------|
| PubMed   | <p> ("metabolic syndrome"[MeSH Terms] OR ("metabolic"[All Fields] AND "syndrome"[All Fields]) OR "metabolic syndrome"[All Fields] OR "MetS"[All Fields] OR ("ms"[Journal] OR "med sci paris"[Journal] OR "ms"[All Fields]) OR ("Plurimetabolic"[All Fields] AND ("syndrom"[All Fields] OR "syndromal"[All Fields] OR "syndromally"[All Fields] OR "syndrome"[MeSH Terms] OR "syndrome"[All Fields] OR "syndromes"[All Fields] OR "syndrome s"[All Fields] OR "syndromic"[All Fields] OR "syndroms"[All Fields])) OR ((("dysmetabolic"[All Fields] OR "dysmetabolism"[All Fields] OR "dysmetabolisms"[All Fields]) AND ("syndrom"[All Fields] OR "syndromal"[All Fields] OR "syndromally"[All Fields] OR "syndrome"[MeSH Terms] OR "syndrome"[All Fields] OR "syndromes"[All Fields] OR "syndrome s"[All Fields] OR "syndromic"[All Fields] OR "syndroms"[All Fields])) OR ((("syndrom"[All Fields] OR "syndromal"[All Fields] OR "syndromally"[All Fields] OR "syndrome"[MeSH Terms] OR "syndrome"[All Fields] OR "syndromes"[All Fields] OR "syndrome s"[All Fields] OR "syndromic"[All Fields] OR "syndroms"[All Fields]) AND "X"[All Fields]) OR ("insulin resistance"[MeSH Terms] OR ("insulin"[All Fields] AND "resistance"[All Fields]) OR "insulin resistance"[All Fields])) AND ("cupping"[All Fields] OR "cuppings"[All Fields] OR "cups"[All Fields] OR "Hijama"[All Fields] OR "Al-Hijamah"[All Fields]) </p> <p> Translations </p> <p> Metabolic Syndrome: "metabolic syndrome"[MeSH Terms] OR ("metabolic"[All Fields] AND "syndrome"[All Fields]) OR "metabolic syndrome"[All Fields] </p> <p> MS: "Ms"[Journal: __jid0371720] OR "Med Sci (Paris)"[Journal: __jid8710980] OR "ms"[All Fields] </p> <p> syndrome: "syndrom"[All Fields] OR "syndromal"[All Fields] OR "syndromally"[All Fields] OR "syndrome"[MeSH Terms] OR "syndrome"[All Fields] OR "syndromes"[All Fields] OR </p> |

|                 |                                                                                                                                                                                                                                                                                                                                                                                                                                                                                                                                                                                                                                                                                                                                                                                                                                                                                                                                                           |
|-----------------|-----------------------------------------------------------------------------------------------------------------------------------------------------------------------------------------------------------------------------------------------------------------------------------------------------------------------------------------------------------------------------------------------------------------------------------------------------------------------------------------------------------------------------------------------------------------------------------------------------------------------------------------------------------------------------------------------------------------------------------------------------------------------------------------------------------------------------------------------------------------------------------------------------------------------------------------------------------|
|                 | <p>"syndrome's"[All Fields] OR "syndromic"[All Fields] OR "syndroms"[All Fields]</p> <p>Dysmetabolic: "dysmetabolic"[All Fields] OR "dysmetabolism"[All Fields] OR "dysmetabolisms"[All Fields]</p> <p>syndrome: "syndrom"[All Fields] OR "syndromal"[All Fields] OR "syndromally"[All Fields] OR "syndrome"[MeSH Terms] OR "syndrome"[All Fields] OR "syndromes"[All Fields] OR "syndrome's"[All Fields] OR "syndromic"[All Fields] OR "syndroms"[All Fields]</p> <p>syndrome: "syndrom"[All Fields] OR "syndromal"[All Fields] OR "syndromally"[All Fields] OR "syndrome"[MeSH Terms] OR "syndrome"[All Fields] OR "syndromes"[All Fields] OR "syndrome's"[All Fields] OR "syndromic"[All Fields] OR "syndroms"[All Fields]</p> <p>insulin resistance: "insulin resistance"[MeSH Terms] OR ("insulin"[All Fields] AND "resistance"[All Fields]) OR "insulin resistance"[All Fields]</p> <p>cupping: "cupping"[All Fields] OR "cuppings"[All Fields]</p> |
| Embase          | ((Metabolic Syndrome or MetS or MS or Plurimetabolic syndrome or Dysmetabolic syndrome or syndrome X or insulin resistance) and (cupping or cups or Hijama or Al-Hijamah)).af.                                                                                                                                                                                                                                                                                                                                                                                                                                                                                                                                                                                                                                                                                                                                                                            |
| Medline         | All text: ( Metabolic Syndrome OR Plurimetabolic syndrome OR Dysmetabolic syndrome OR syndrome X OR insulin resistance ) AND All text: ( cupping or cups or Hijama or Al-Hijamah )                                                                                                                                                                                                                                                                                                                                                                                                                                                                                                                                                                                                                                                                                                                                                                        |
| Cochrane        | (Metabolic Syndrome or MetS or MS or Plurimetabolic syndrome or Dysmetabolic syndrome or syndrome X or insulin resistance)All text AND (cupping or cups or Hijama or Al-Hijamah)All text                                                                                                                                                                                                                                                                                                                                                                                                                                                                                                                                                                                                                                                                                                                                                                  |
| CINAHL          | All text: ( Metabolic Syndrome OR Plurimetabolic syndrome OR Dysmetabolic syndrome OR syndrome X OR insulin resistance ) AND All text: ( cupping or cups or Hijama or Al-Hijamah )                                                                                                                                                                                                                                                                                                                                                                                                                                                                                                                                                                                                                                                                                                                                                                        |
| Web of Science  | All text: (Metabolic Syndrome OR Plurimetabolic syndrome OR Dysmetabolic syndrome OR syndrome X OR insulin resistance) AND All text: (cupping or cups or Hijama or Al-Hijamah)                                                                                                                                                                                                                                                                                                                                                                                                                                                                                                                                                                                                                                                                                                                                                                            |
| Alt HealthWatch | All text: ( Metabolic Syndrome OR Plurimetabolic syndrome OR Dysmetabolic syndrome OR syndrome X OR insulin resistance ) AND All text: ( cupping or cups or Hijama or Al-Hijamah )                                                                                                                                                                                                                                                                                                                                                                                                                                                                                                                                                                                                                                                                                                                                                                        |
| Health Source   | All text: ( Metabolic Syndrome OR Plurimetabolic syndrome OR Dysmetabolic syndrome OR syndrome X OR insulin resistance ) AND All                                                                                                                                                                                                                                                                                                                                                                                                                                                                                                                                                                                                                                                                                                                                                                                                                          |

|                                                                                   |                                                                                                                                                                                                                        |
|-----------------------------------------------------------------------------------|------------------------------------------------------------------------------------------------------------------------------------------------------------------------------------------------------------------------|
|                                                                                   | text: ( cupping or cups or Hijama or Al-Hijamah )                                                                                                                                                                      |
| Health and Psychosocial Instruments                                               | All text: ( Metabolic Syndrome OR Plurimetabolic syndrome OR Dysmetabolic syndrome OR syndrome X OR insulin resistance ) AND All text: ( cupping or cups or Hijama or Al-Hijamah )                                     |
| clinical trials.gov (www.clinicaltrials.gov).                                     | (Metabolic Syndrome OR Plurimetabolic syndrome OR Dysmetabolic syndrome OR syndrome X OR insulin resistance) AND (Cup)                                                                                                 |
| World Health Organization International Clinical Trials Registry Platform (ICTRP) | (Metabolic Syndrome OR Plurimetabolic syndrome OR Dysmetabolic syndrome OR syndrome X OR insulin resistance) AND (cupping OR cups OR Hijama OR Al-Hijamah)                                                             |
| International Standard Randomised Controlled Trial Number (ISRCTN)                | Metabolic Syndrome OR Plurimetabolic syndrome OR Dysmetabolic syndrome OR syndrome X OR insulin resistance AND ( Interventions: Cupping OR cups OR Hijama OR Al- Hijamah )                                             |
| 中國知網(CNKI)                                                                        | (SU='代谢症候群' OR SU='代谢性症候群' OR SU='代谢综合征' OR SU='新陈代谢症' OR SU='多发性代谢性症候群' OR SU='多型性代谢' OR SU='代谢不良症候群' OR SU=' X 症候群' OR SU='胰島素阻抗' OR SU='胰島素抵抗') AND (FT='罐' OR FT='拔罐' OR FT='cupping')                             |
| 萬方數據知識服務平台(WanFang)                                                               | 全部:(代谢症候群 or 代谢性症候群 or 代谢综合征 or 新陈代谢症 or 多发性代谢性症候群 or 多型性代谢 or 代谢不良症候群 or X 症候群 or 胰島素阻抗 or 胰島素抵抗) and 全部:(罐 or 拔罐 or cupping)                                                                                         |
| 華藝線上圖書館 (AiritiLibrary)                                                           | 查詢 (Metabolic Syndrome) = 所有欄位 OR (MetS) = 所有欄位 OR (MS) = 所有欄位 OR (Plurimetabolic syndrome) = 所有欄位 OR (Dysmetabolic syndrome) = 所有欄位 OR (syndrome X) = 所有欄位 OR (insulin resistance) = 所有欄位 AND ('cupping') = 篇名.關鍵字.摘要 |
