# Supplementary material for: The efficacy and safety of cupping as complementary and alternative therapy for metabolic syndrome: A systematic review and meta-analysis
Source: PubMed Central journal article supplement — Medicine (Baltimore). 2023 Mar 31;102(13):e33341. doi: 10.1097/MD.0000000000033341 (PMC10063281; doi:10.1097/md.0000000000033341), 2023-03-31
Supplement: medi-102-e33341-s003.pdf [file medi-102-e33341-s003.pdf]

Supplemental Digital Content 3. Graph illustrating subgroup analysis by location of waist circumference in the meta-analysis.

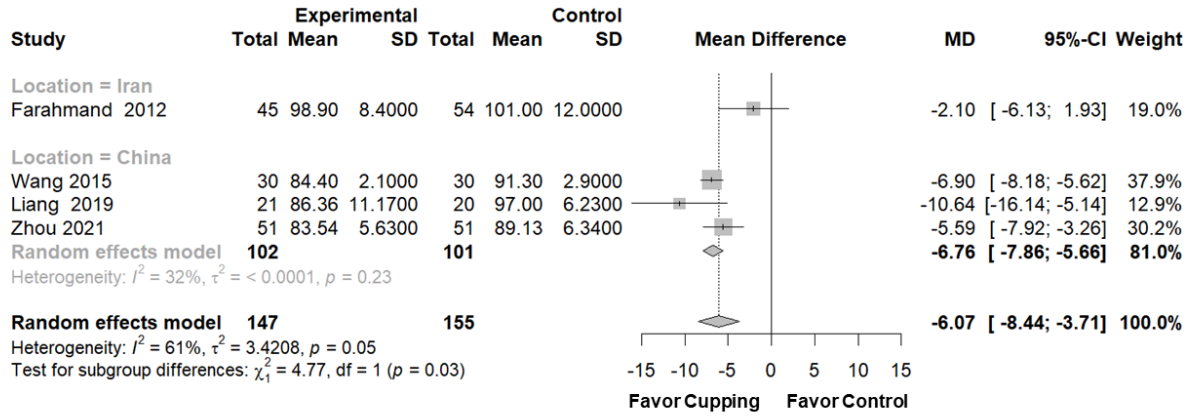

**Supplement 3. Subgroup analysis by location of the waist circumference result in the meta-analysis**
